# Supplementary material
Source: publisher figshare collection journal article supplement (https://sage.figshare.com/ndownloader/files/21599589)

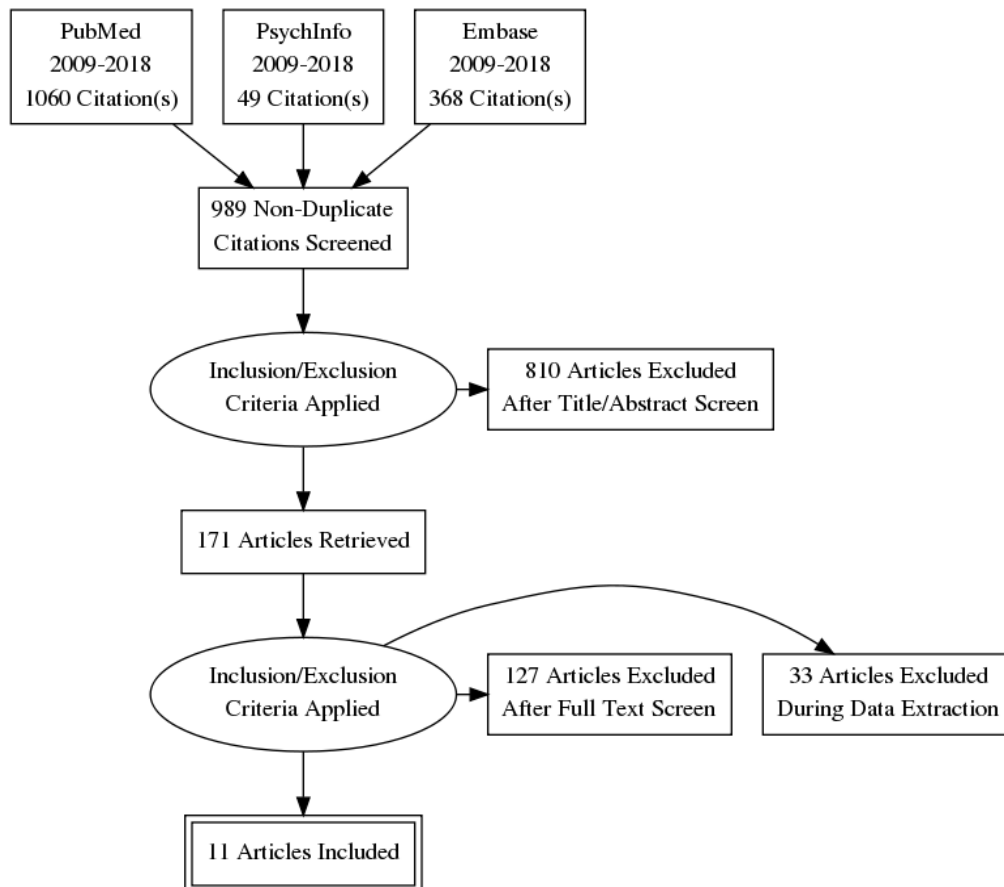

*Figure 1: Flowchart – review and selection process*

Supplement: Supplementary file 1 [file 21599589]
